# Supplementary material for: Diet and Acanthosis Nigricans over a Two-Year Period in Children of the Pacific Region
Source: MDPI journal article supplement (doi:10.3390/nu15122718), 2023-06-12
Supplement: s1 [file s1]

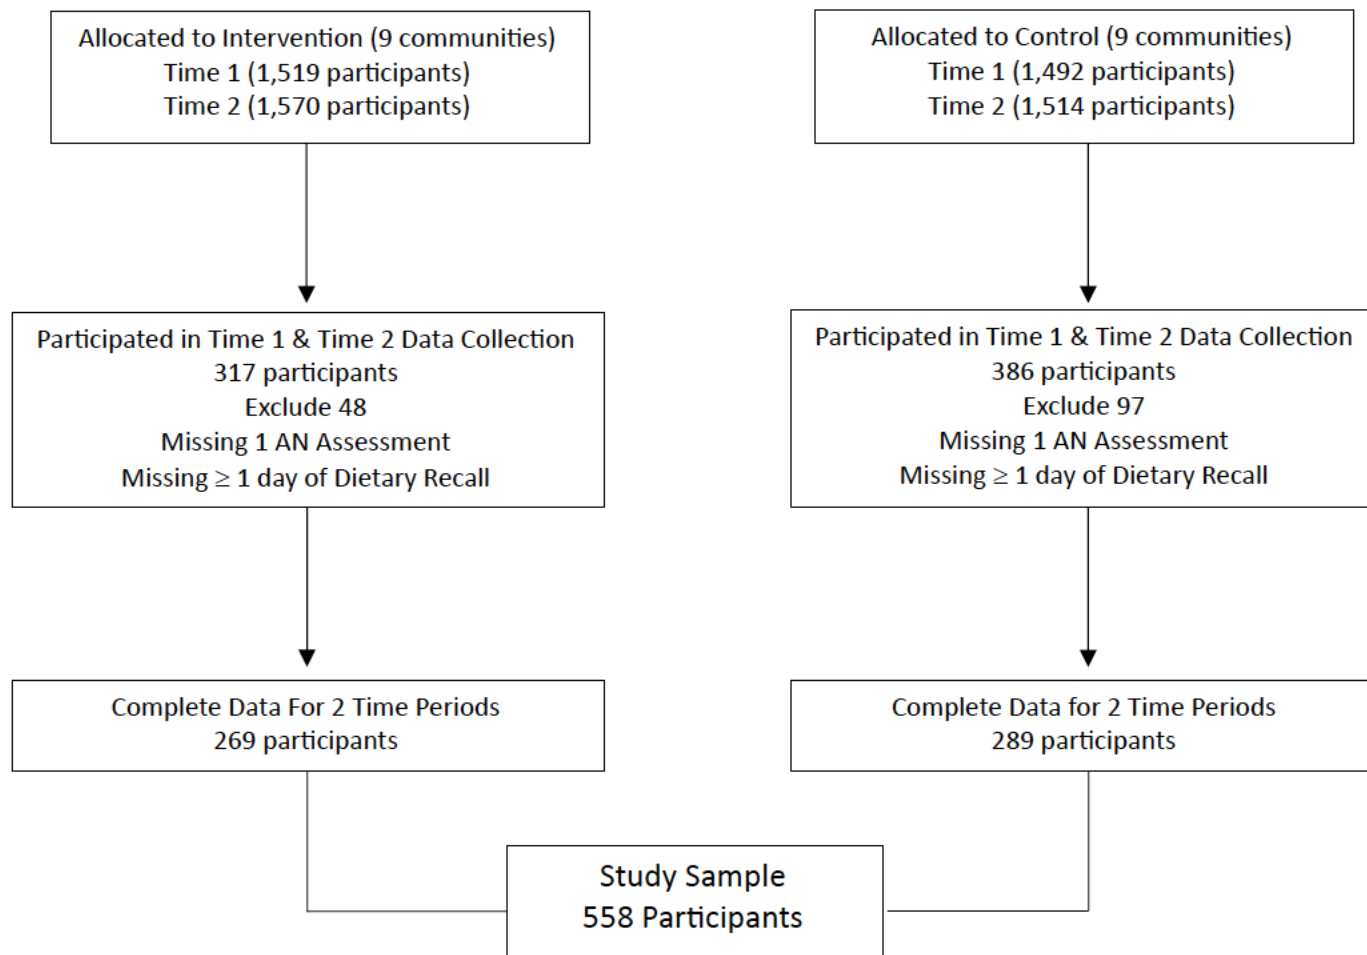

**Supplemental Figure S1.** Consort Design – Study Participants

**Supplemental Table S1.** Baseline daily dietary intake of children in four acanthosis nigricans groups

| Nutrient/Food Group           | Never<br>(n=508)<br>$\bar{x} \pm SE^1$ | Chronic<br>(n=12)<br>$\bar{x} \pm SE$ | Develop<br>(n=22)<br>$\bar{x} \pm SE$ | Remission<br>(n=16)<br>$\bar{x} \pm SE$ |
|-------------------------------|----------------------------------------|---------------------------------------|---------------------------------------|-----------------------------------------|
| Energy (kcal)                 | 1888.9 $\pm$ 23.7                      | 2116.3 $\pm$ 133.3                    | 1886.1 $\pm$ 127.3                    | 1729.9 $\pm$ 114.2                      |
| Carbohydrate (g)              | 253.1 $\pm$ 3.3                        | 265.7 $\pm$ 19.6                      | 239.9 $\pm$ 17.3                      | 234.4 $\pm$ 16.5                        |
| Protein (g)*                  | 69.8 $\pm$ 0.9                         | 87.0 $\pm$ 5.2                        | 73.6 $\pm$ 4.7                        | 66.9 $\pm$ 4.3                          |
| Fat (g)                       | 66.8 $\pm$ 0.9                         | 76.8 $\pm$ 4.8                        | 69.0 $\pm$ 5.0                        | 59.4 $\pm$ 4.6                          |
| Added Fat (g)                 | 32.7 $\pm$ 0.4                         | 38.8 $\pm$ 2.4                        | 32.9 $\pm$ 2.5                        | 28.3 $\pm$ 1.7                          |
| Added Sugar (tsp)             | 11.6 $\pm$ 0.2                         | 9.8 $\pm$ 1.7                         | 9.8 $\pm$ 0.8                         | 9.3 $\pm$ 1.0                           |
| Milk                          | 1.2 $\pm$ 0.03                         | 1.2 $\pm$ 0.2                         | 1.0 $\pm$ 0.1                         | 1.1 $\pm$ 0.1                           |
| Total Dairy                   | 1.4 $\pm$ 0.0                          | 1.5 $\pm$ 0.1                         | 1.3 $\pm$ 0.1                         | 1.3 $\pm$ 0.1                           |
| Citrus (servings)             | 0.27 $\pm$ 0.01                        | 0.33 $\pm$ 0.07                       | 0.26 $\pm$ 0.05                       | 0.22 $\pm$ 0.06                         |
| Other Fruit (servings)        | 0.80 $\pm$ 0.02                        | 0.92 $\pm$ 0.18                       | 0.66 $\pm$ 0.08                       | 0.70 $\pm$ 0.13                         |
| Total Fruit (servings)        | 1.15 $\pm$ 0.03                        | 1.34 $\pm$ 0.23                       | 0.95 $\pm$ 0.10                       | 0.99 $\pm$ 0.17                         |
| Non-Whole Grain (servings)    | 6.46 $\pm$ 0.10                        | 7.26 $\pm$ 0.58                       | 6.77 $\pm$ 0.53                       | 6.41 $\pm$ 0.52                         |
| Whole Grains (servings)       | 0.38 $\pm$ 0.02                        | 0.31 $\pm$ 0.11                       | 0.45 $\pm$ 0.09                       | 0.33 $\pm$ 0.12                         |
| Total Grain (servings)        | 7.01 $\pm$ 0.10                        | 7.75 $\pm$ 0.57                       | 7.38 $\pm$ 0.55                       | 6.97 $\pm$ 0.50                         |
| Egg (oz equivalent)           | 0.49 $\pm$ 0.02                        | 0.44 $\pm$ 0.12                       | 0.60 $\pm$ 0.08                       | 0.51 $\pm$ 0.09                         |
| Red Meat (oz)**               | 0.78 $\pm$ 0.03                        | 1.30 $\pm$ 0.27                       | 0.81 $\pm$ 0.14                       | 0.79 $\pm$ 0.14                         |
| All Meat                      | 4.67 $\pm$ 0.08                        | 6.51 $\pm$ 0.52                       | 5.21 $\pm$ 0.40                       | 4.33 $\pm$ 0.34                         |
| Animal Sourced Food*          | 6.98 $\pm$ 0.15                        | 8.74 $\pm$ 0.98                       | 7.65 $\pm$ 0.84                       | 6.26 $\pm$ 0.71                         |
| Potato (servings)*            | 0.08 $\pm$ 0.00                        | 0.12 $\pm$ 0.04                       | 0.14 $\pm$ 0.02                       | 0.13 $\pm$ 0.04                         |
| Starchy Veggies (servings)    | 0.07 $\pm$ 0.01                        | 0.09 $\pm$ 0.02                       | 0.11 $\pm$ 0.02                       | 0.04 $\pm$ 0.02                         |
| Total Vegetables (servings)   | 0.7 $\pm$ 0.02                         | 0.9 $\pm$ 0.08                        | 0.8 $\pm$ 0.08                        | 0.7 $\pm$ 0.10                          |
| Starch Rich Foods (servings)  | 18.2 $\pm$ 0.30                        | 17.3 $\pm$ 2.2                        | 16.8 $\pm$ 1.2                        | 15.9 $\pm$ 1.3                          |
| Sugar Sweetened Beverages (g) | 187.4 $\pm$ 7.4                        | 182.3 $\pm$ 59.0                      | 153.0 $\pm$ 25.4                      | 101.4 $\pm$ 31.8                        |
| Water (g)                     | 354.6 $\pm$ 10.8                       | 474.7 $\pm$ 101.0                     | 401.9 $\pm$ 61.6                      | 392.4 $\pm$ 53.4                        |

<sup>1</sup> Mean and Standard Error; \* p  $\leq$  0.05; \*\* p  $\leq$  0.01

**Supplemental Table S2.** Change in dietary intake of children in four acanthosis nigricans groups

| Nutrient/Food Group             | Never<br>(n=508)<br>$\bar{x} \pm SE$ | Chronic<br>(n=12)<br>$\bar{x} \pm SE$ | Develop<br>(n=22)<br>$\bar{x} \pm SE$ | Remission<br>(n=16)<br>$\bar{x} \pm SE$ |
|---------------------------------|--------------------------------------|---------------------------------------|---------------------------------------|-----------------------------------------|
| Energy (kcal)*                  | 130.87 $\pm$ 25.60                   | -124.75 $\pm$ 204.71                  | 429.65 $\pm$ 161.22                   | 303.47 $\pm$ 150.36                     |
| Carbohydrate (g)**              | 16.20 $\pm$ 3.77                     | -31.35 $\pm$ 27.41                    | 72.11 $\pm$ 23.03                     | 37.65 $\pm$ 26.09                       |
| Protein (g)*                    | 6.01 $\pm$ 0.96                      | -1.73 $\pm$ 8.05                      | 10.98 $\pm$ 5.37                      | 9.82 $\pm$ 4.74                         |
| Fat (g)                         | 4.72 $\pm$ 1.08                      | 0.36 $\pm$ 8.32                       | 11.83 $\pm$ 6.28                      | 10.99 $\pm$ 5.04                        |
| Added Fat (g)                   | 2.82 $\pm$ 0.54                      | -1.67 $\pm$ 4.16                      | 6.70 $\pm$ 3.65                       | 6.36 $\pm$ 2.40                         |
| Added Sugar (tsp) ***           | 0.50 $\pm$ 0.30                      | -1.92 $\pm$ 1.39                      | 6.31 $\pm$ 1.64                       | 2.10 $\pm$ 1.47                         |
| Milk                            | 0.04 $\pm$ 0.03                      | 0.07 $\pm$ 0.26                       | 0.25 $\pm$ 0.17                       | 0.14 $\pm$ 0.21                         |
| Total Dairy                     | 0.06 $\pm$ 0.04                      | -0.02 $\pm$ 0.26                      | 0.30 $\pm$ 0.18                       | 0.12 $\pm$ 0.22                         |
| Citrus (servings)               | 0.04 $\pm$ 0.02                      | -0.15 $\pm$ 0.07                      | -0.04 $\pm$ 0.08                      | 0.03 $\pm$ 0.08                         |
| Other Fruit (servings)          | -0.01 $\pm$ 0.03                     | -0.30 $\pm$ 0.28                      | -0.08 $\pm$ 0.12                      | 0.02 $\pm$ 0.21                         |
| Total Fruit (servings)          | -0.00 $\pm$ 0.03                     | -0.47 $\pm$ 0.32                      | -0.09 $\pm$ 0.14                      | -0.03 $\pm$ 0.27                        |
| Non-Whole Grain (servings)      | 0.54 $\pm$ 0.11                      | -0.57 $\pm$ 0.72                      | 1.68 $\pm$ 0.67                       | 0.68 $\pm$ 0.60                         |
| Whole Grains (servings)         | 0.10 $\pm$ 0.03                      | 0.25 $\pm$ 0.22                       | -0.02 $\pm$ 0.11                      | 0.22 $\pm$ 0.18                         |
| Total Grain (servings)          | 0.67 $\pm$ 0.11                      | -0.37 $\pm$ 0.70                      | 1.64 $\pm$ 0.67                       | 0.94 $\pm$ 0.64                         |
| Egg (oz equivalent)             | -0.14 $\pm$ 0.05                     | -0.78 $\pm$ 0.43                      | -0.06 $\pm$ 0.32                      | -0.37 $\pm$ 0.29                        |
| Red Meat (oz)                   | 0.22 $\pm$ 0.04                      | 0.35 $\pm$ 0.35                       | 0.32 $\pm$ 0.16                       | -0.05 $\pm$ 0.22                        |
| All Meat                        | 0.41 $\pm$ 0.09                      | 0.07 $\pm$ 0.44                       | 0.56 $\pm$ 0.48                       | 0.98 $\pm$ 0.51                         |
| Animal Sourced Food             | -0.09 $\pm$ 0.18                     | -1.28 $\pm$ 1.36                      | 0.20 $\pm$ 0.98                       | 0.80 $\pm$ 1.00                         |
| Potato (servings)*              | 0.01 $\pm$ 0.01                      | -0.02 $\pm$ 0.04                      | -0.06 $\pm$ 0.03                      | -0.06 $\pm$ 0.05                        |
| Starchy Veggies (servings)      | 0.02 $\pm$ 0.01                      | -0.02 $\pm$ 0.04                      | -0.02 $\pm$ 0.04                      | -0.02 $\pm$ 0.03                        |
| Total Vegetables (servings)     | 0.11 $\pm$ 0.02                      | -0.02 $\pm$ 0.12                      | -0.04 $\pm$ 0.12                      | 0.01 $\pm$ 0.11                         |
| Starch Rich Foods (servings)*** | 1.07 $\pm$ 0.34                      | -2.53 $\pm$ 1.92                      | 7.92 $\pm$ 2.00                       | 2.74 $\pm$ 1.93                         |
| Sugar Sweetened Beverages (g)*  | -0.54 $\pm$ 8.96                     | -125.0 $\pm$ 69.5                     | 95.45 $\pm$ 42.47                     | 37.93 $\pm$ 26.87                       |
| Water                           | 55.93 $\pm$ 13.84                    | 100.29 $\pm$ 140.68                   | 117.31 $\pm$ 85.37                    | 66.92 $\pm$ 67.60                       |

<sup>1</sup> Mean and Standard Error; \*  $p \leq 0.05$ ; \*\*  $p \leq 0.01$ ; \*\*\*  $p \leq 0.001$
